# Supplementary material for: Coumarin-Containing Polymers for High Density Non-Linear Optical Data Storage
Source: MDPI journal article supplement (doi:10.3390/molecules21020147), 2016-01-26
Supplement: s1 [file s1]

# Supplementary Materials: Coumarin-Containing Polymers for High Density Non Linear Optical Data Storage

Denis Gindre, Konstantinos Iliopoulos, Oksana Krupka, Marie Evrard, Emilie Champigny and Marc Sallé

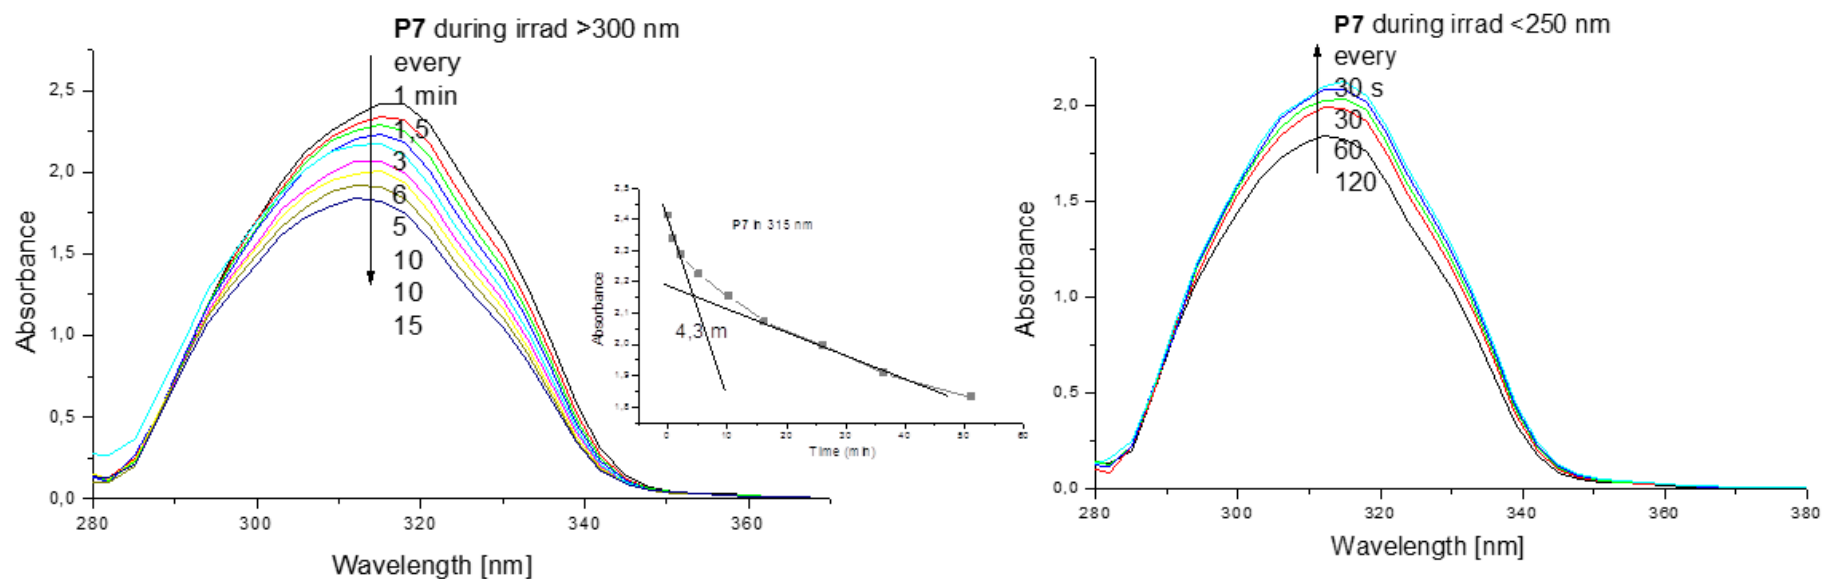

Figure S1. Cont.

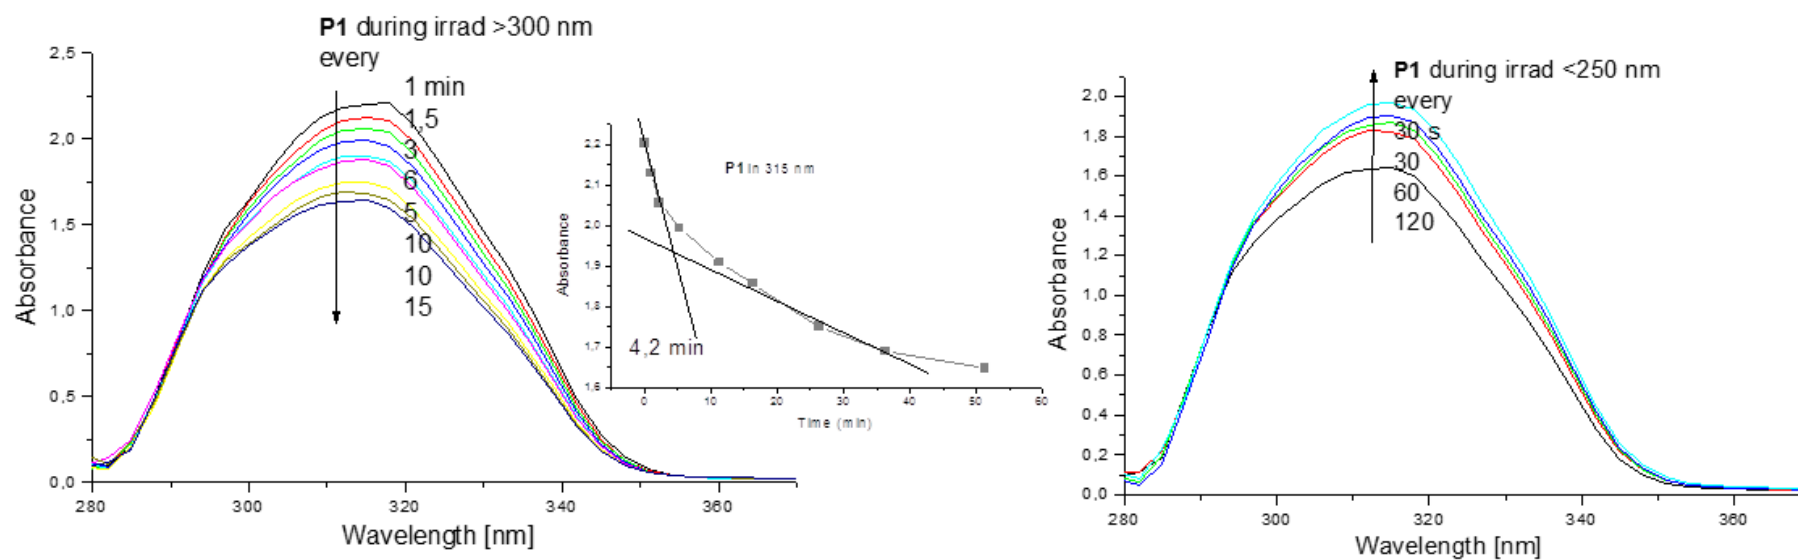

**Figure S1.** Changes in the absorption spectrum of polymer **P7** and **P1** in thin film before (1) and after periods of irradiation at  $\lambda > 300$  nm; Changes in the absorption of film polymers at maximum of absorption during irradiation at  $\lambda > 300$  nm; Changes of the absorption spectrum cross-linked polymer in thin solid film before (1) and after time of UV irradiation at  $\lambda < 254$  nm.

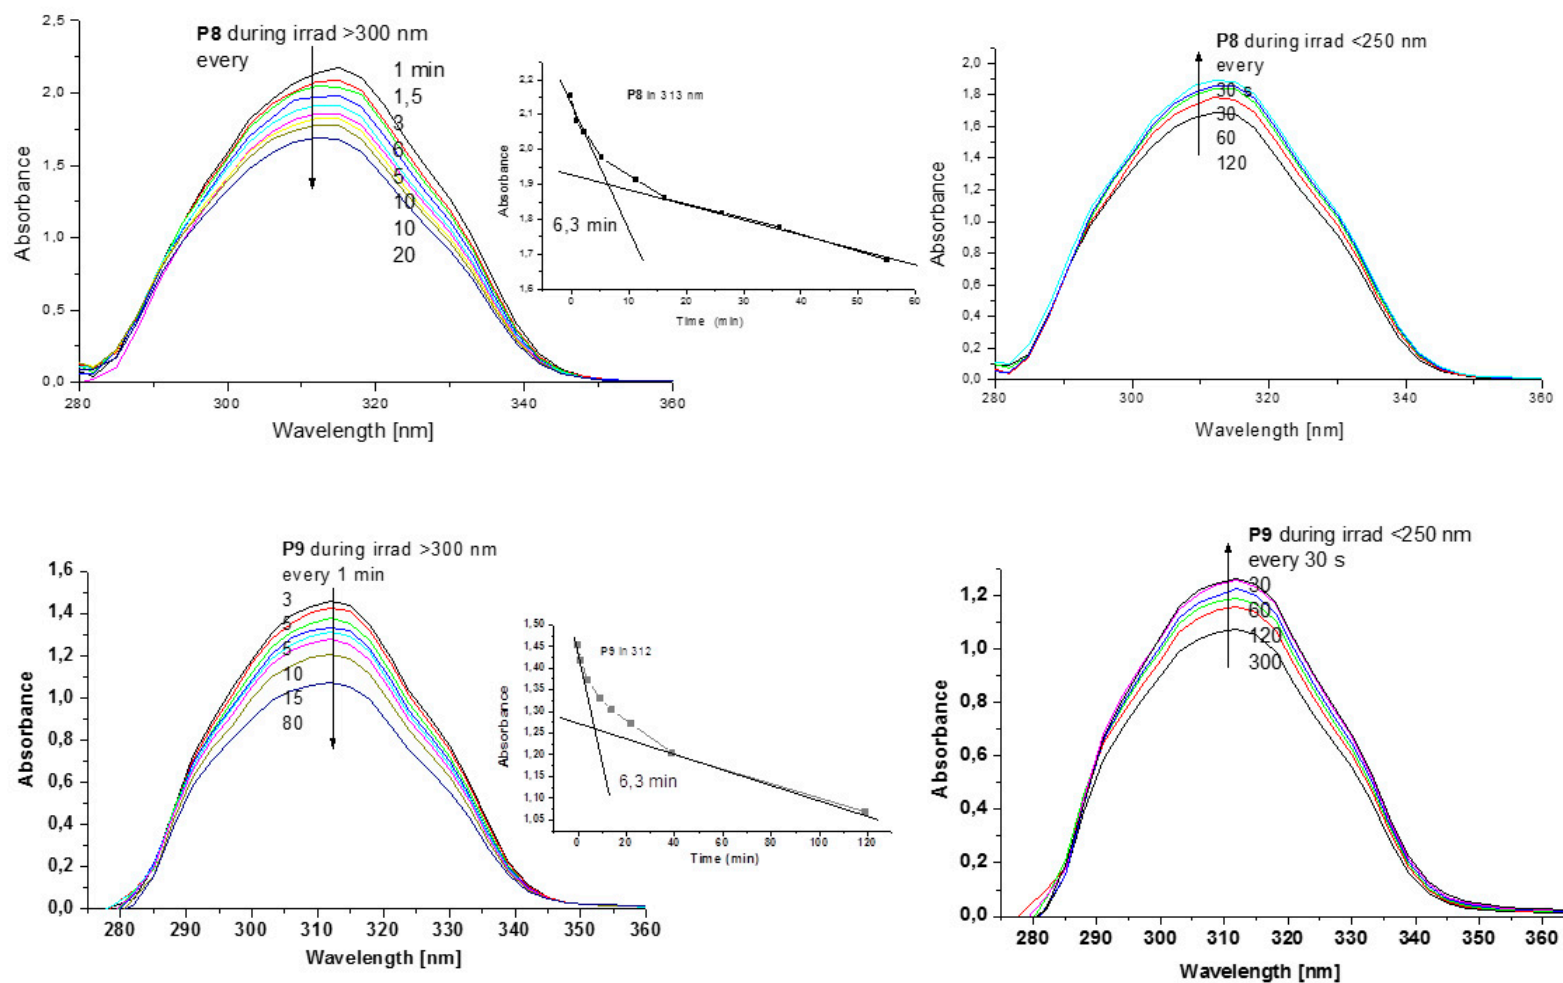

**Figure S2.** Changes in the absorption spectrum of polymer **P8** and **P9** in thin film before (1) and after periods of irradiation at  $\lambda > 300$  nm; Changes in the absorption of film polymers at maximum of absorption during irradiation at  $\lambda > 300$  nm; Changes of the absorption spectrum cross-linked polymer in thin solid film before (1) and after time of UV irradiation at  $\lambda < 254$  nm.

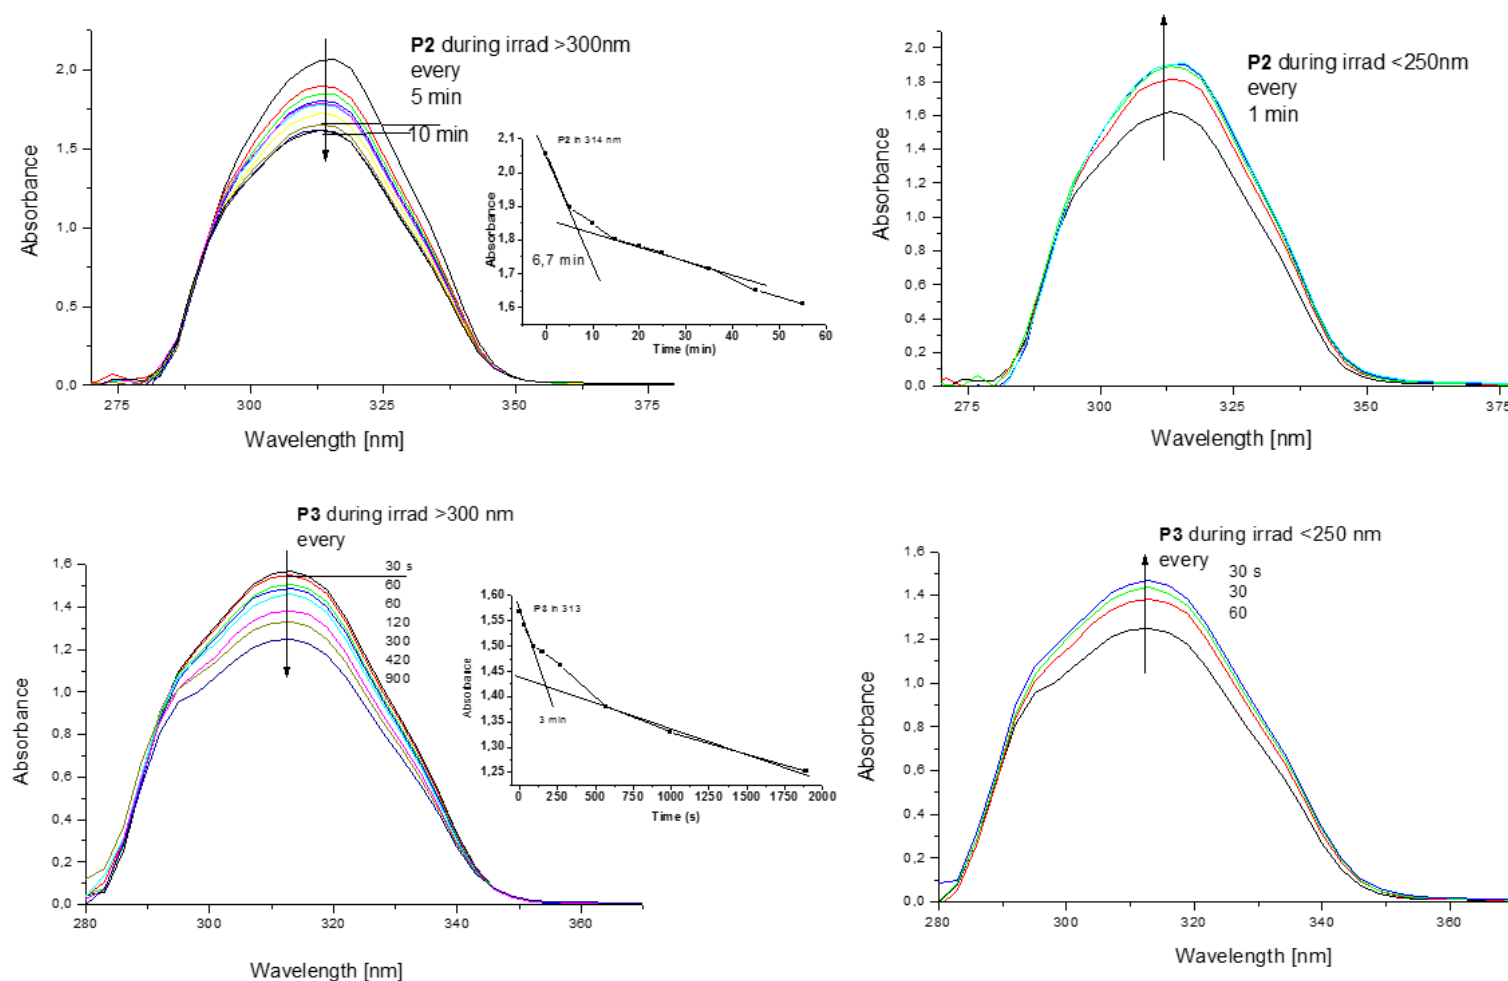

**Figure S3.** Changes in the absorption spectrum of polymer **P2** and **P3** in thin film before (1) and after periods of irradiation at  $\lambda > 300$  nm; Changes in the absorption of film polymers at maximum of absorption during irradiation at  $\lambda > 300$  nm; Changes of the absorption spectrum cross-linked polymer in thin solid film before (1) and after time of UV irradiation at  $\lambda < 254$  nm.

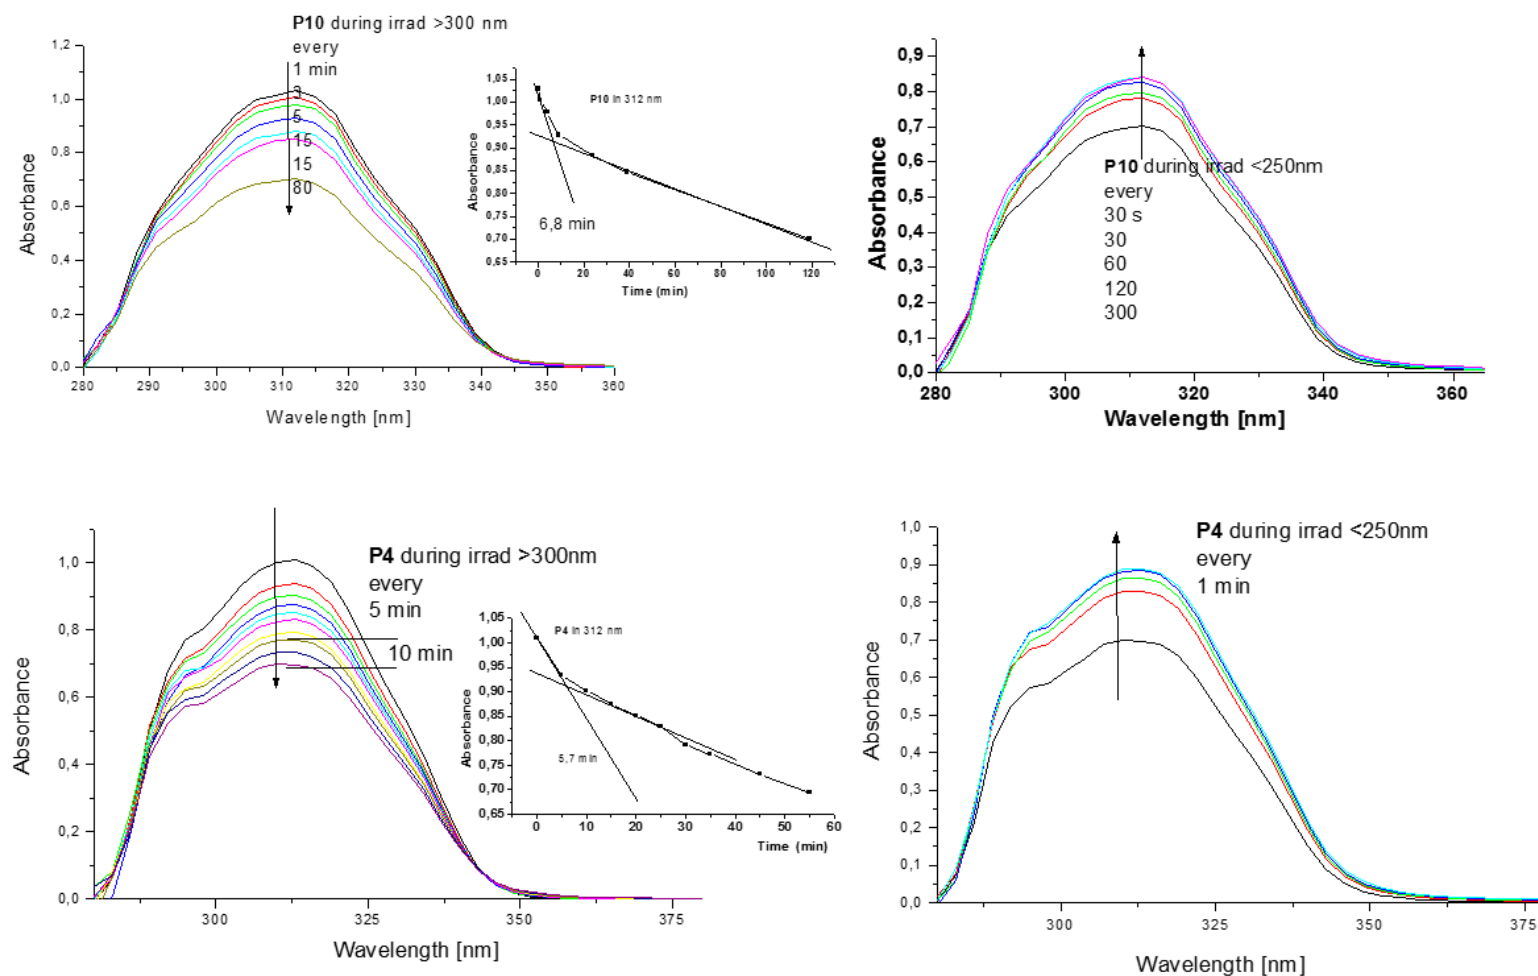

**Figure S4.** Changes in the absorption spectrum of polymer **P10** and **P4** in thin film before (1) and after periods of irradiation at  $\lambda > 300$  nm; Changes in the absorption of film polymers at maximum of absorption during irradiation at  $\lambda > 300$  nm; Changes of the absorption spectrum cross-linked polymer in thin solid film before (1) and after time of UV irradiation at  $\lambda < 254$  nm.

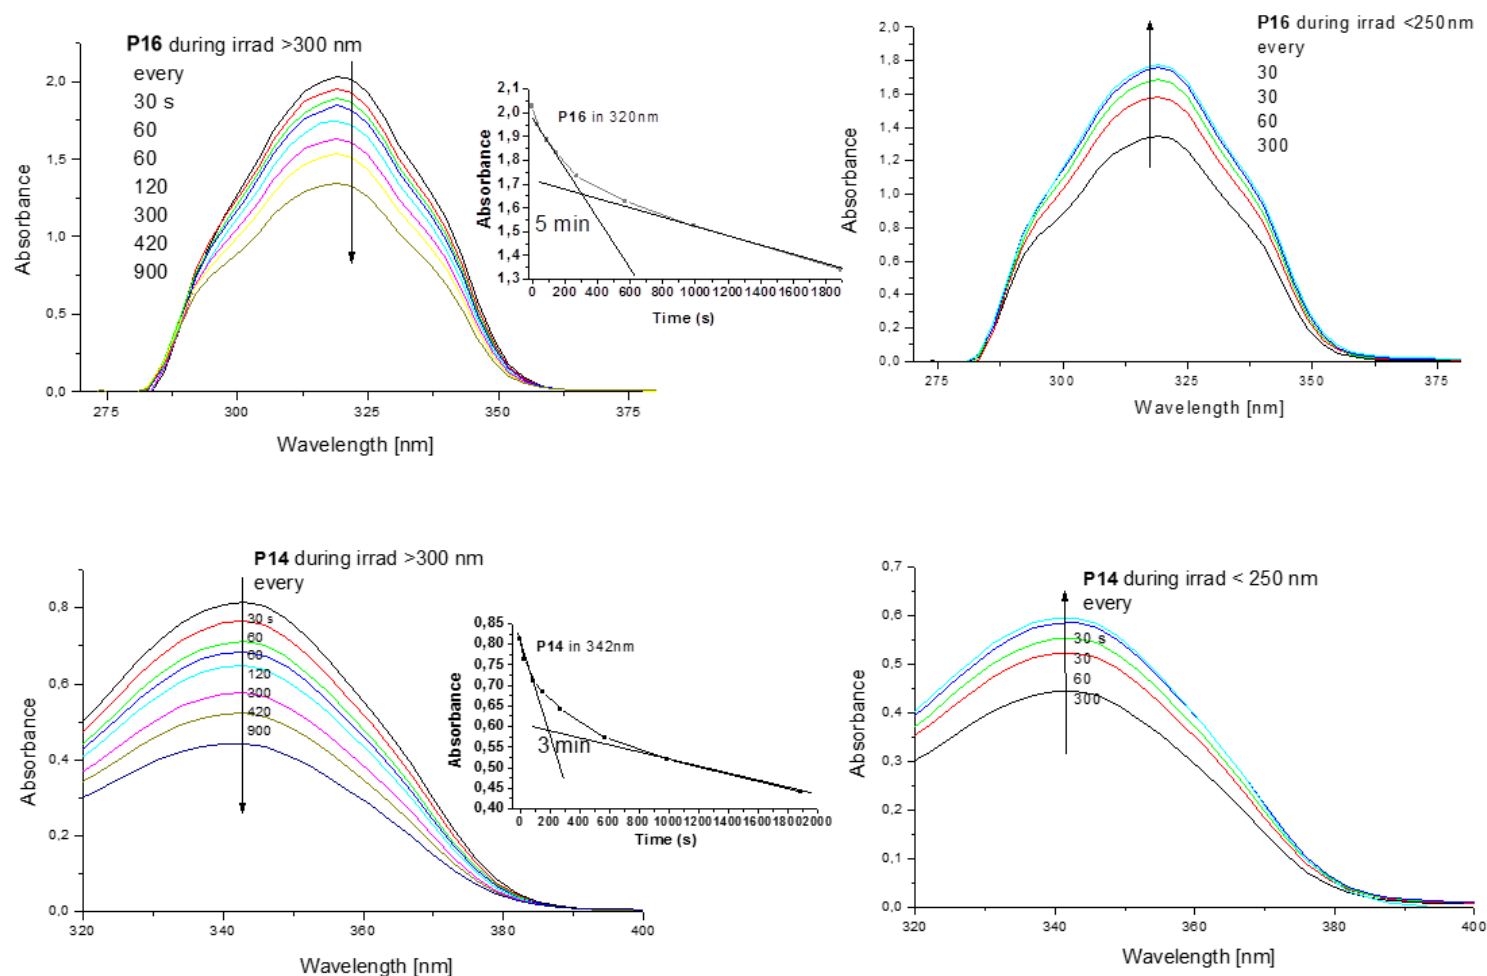

**Figure S5.** Changes in the absorption spectrum of polymer **P16** and **P14** in thin film before (1) and after periods of irradiation at  $\lambda > 300$  nm; Changes in the absorption of film polymers at maximum of absorption during irradiation at  $\lambda > 300$  nm; Changes of the absorption spectrum cross-linked polymer in thin solid film before (1) and after time of UV irradiation at  $\lambda < 254$  nm.

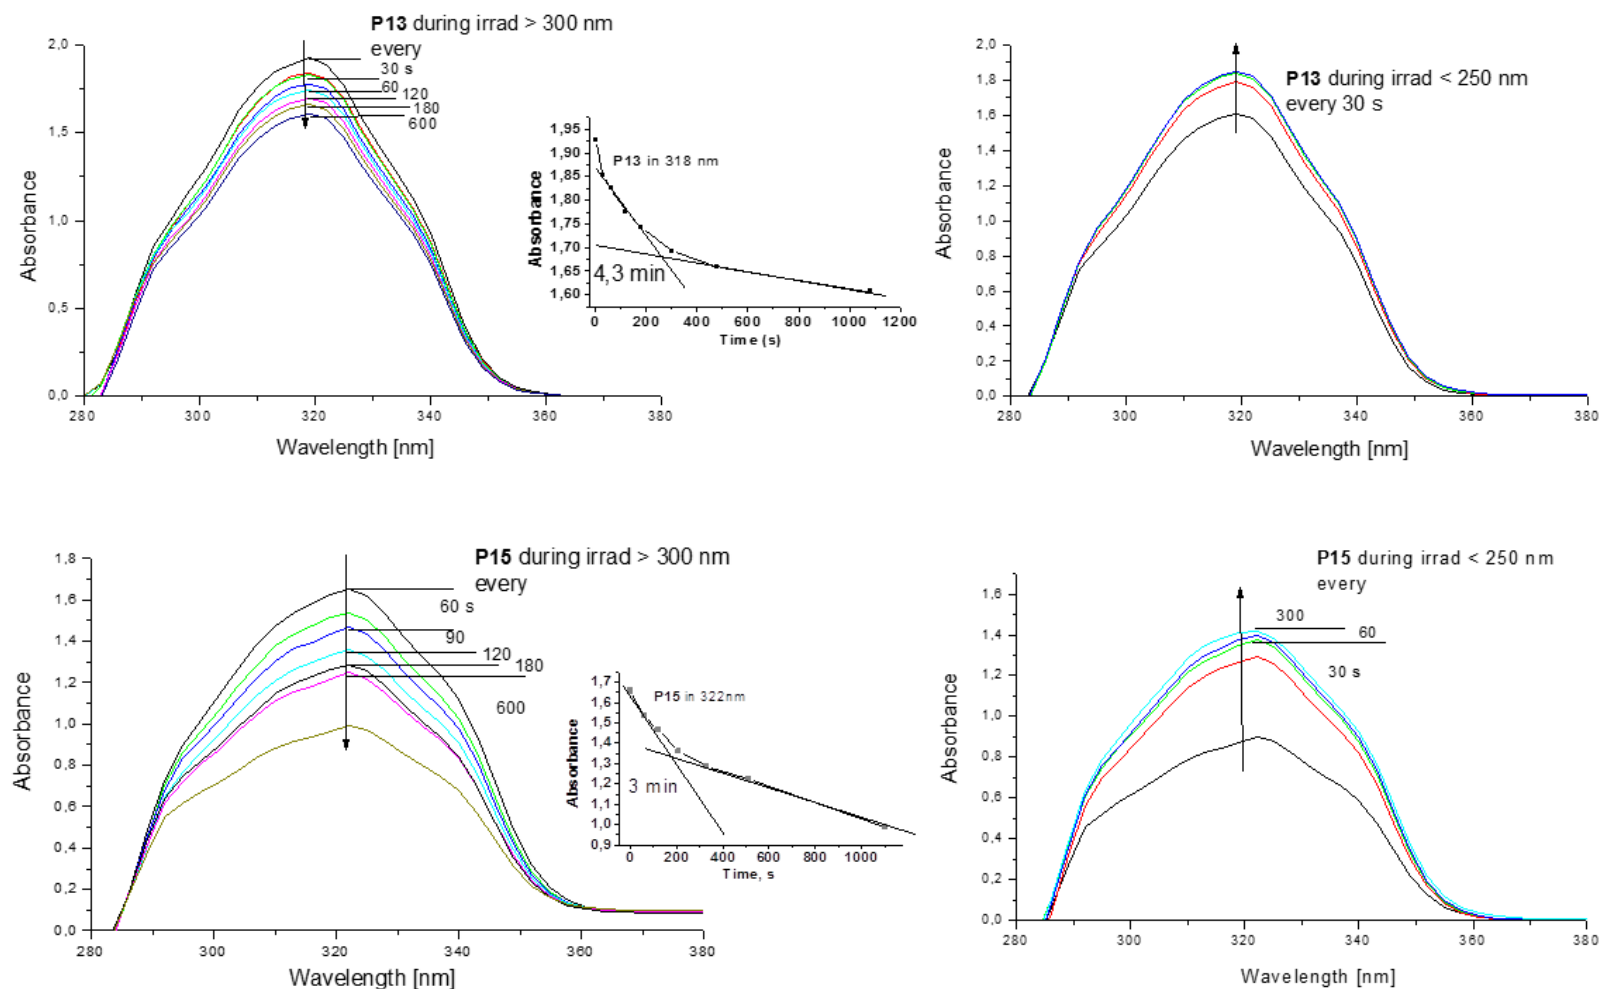

**Figure S6.** Changes in the absorption spectrum of polymer **P13** and **P15** in thin film before (1) and after periods of irradiation at  $\lambda > 300$  nm; Changes in the absorption of film polymers at maximum of absorption during irradiation at  $\lambda > 300$  nm; Changes of the absorption spectrum cross-linked polymer in thin solid film before (1) and after time of UV irradiation at  $\lambda < 254$  nm.
